# Supplementary material for: Global Impact of COVID-19 on Nuclear Medicine Departments: An International Survey in April 2020
Source: J Nucl Med. 2020 Sep;61(9):1278–83. doi: 10.2967/jnumed.120.249821 (PMC7456173; doi:10.2967/jnumed.120.249821)
Supplement: Supplementary file 1 [file jnm249821SupplementaryData.pdf]

**Supplemental figures**

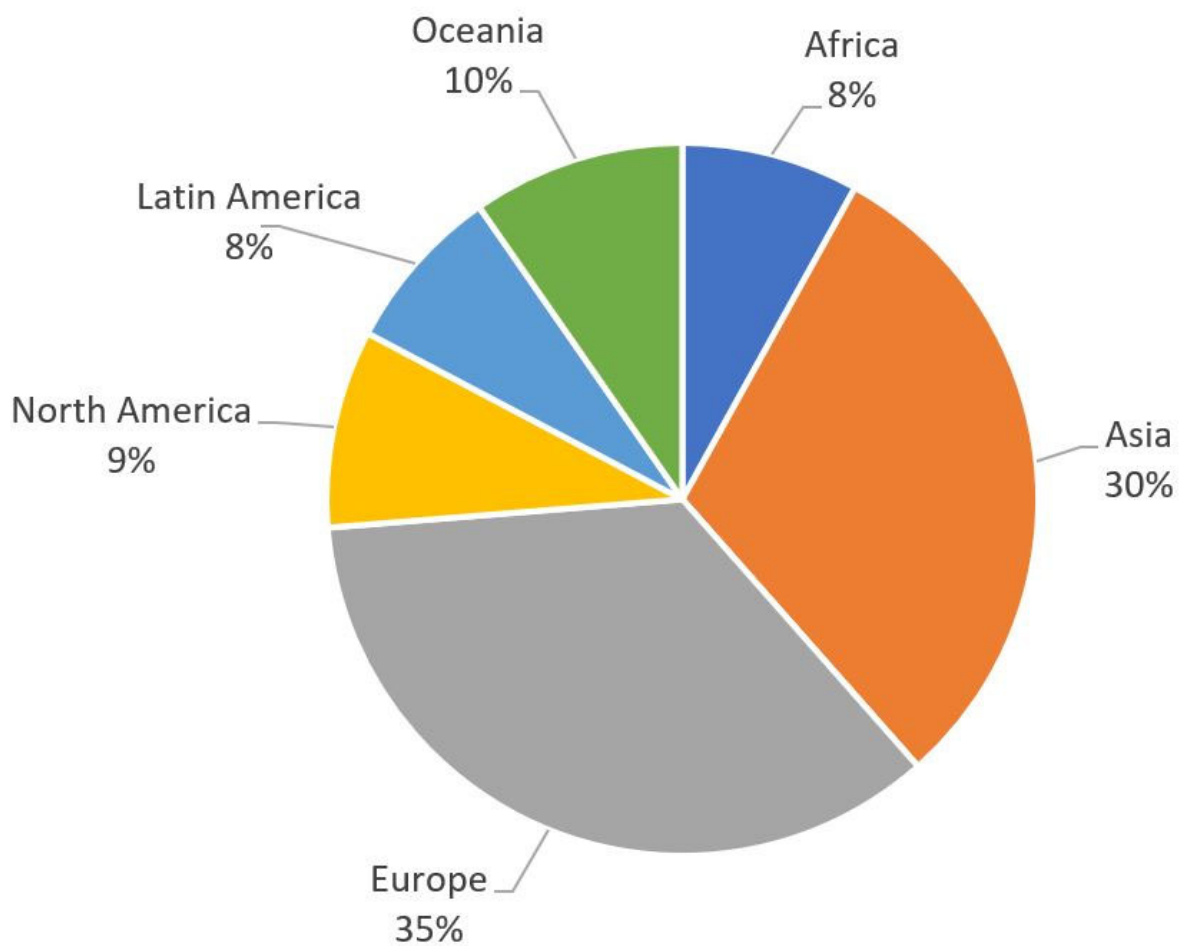

Supplemental Figure 1: Distribution of respondents on the continents (n=434)

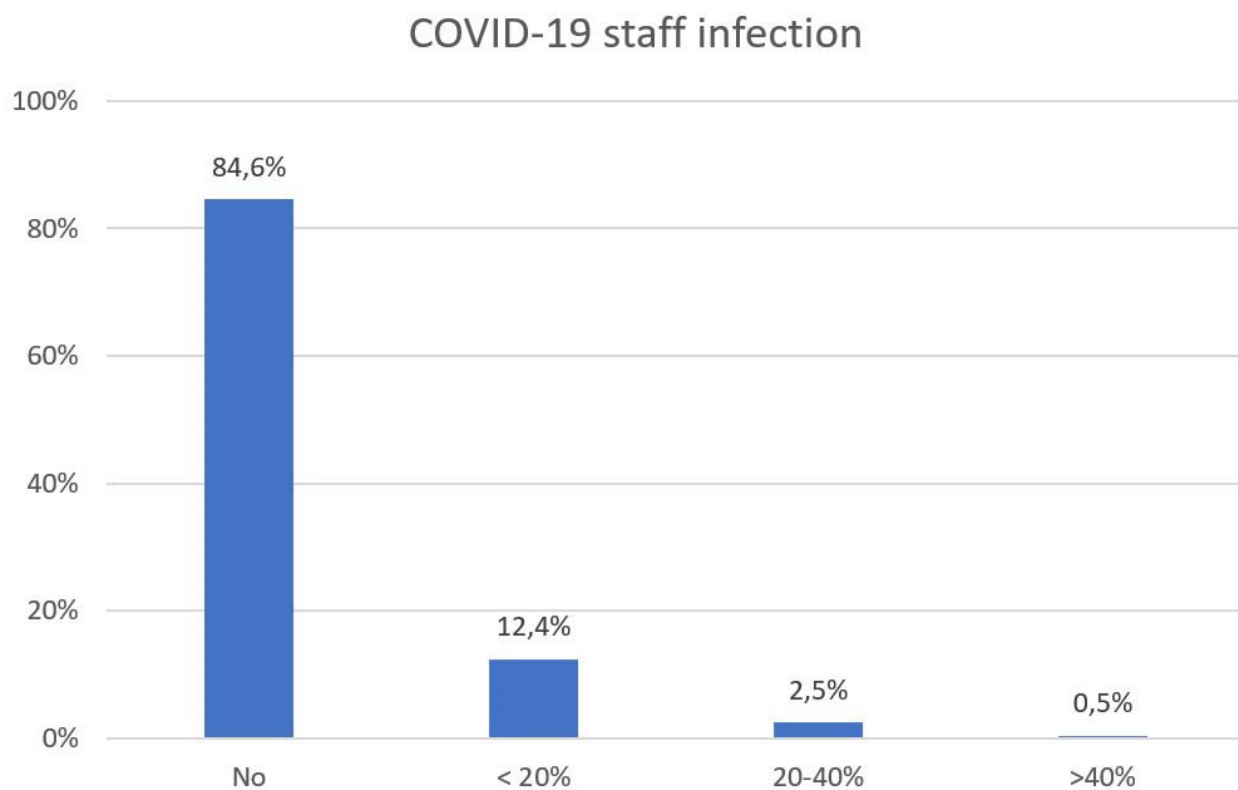

Supplemental Figure 2: Percentage of COVID-19 infections in nuclear medicine staff

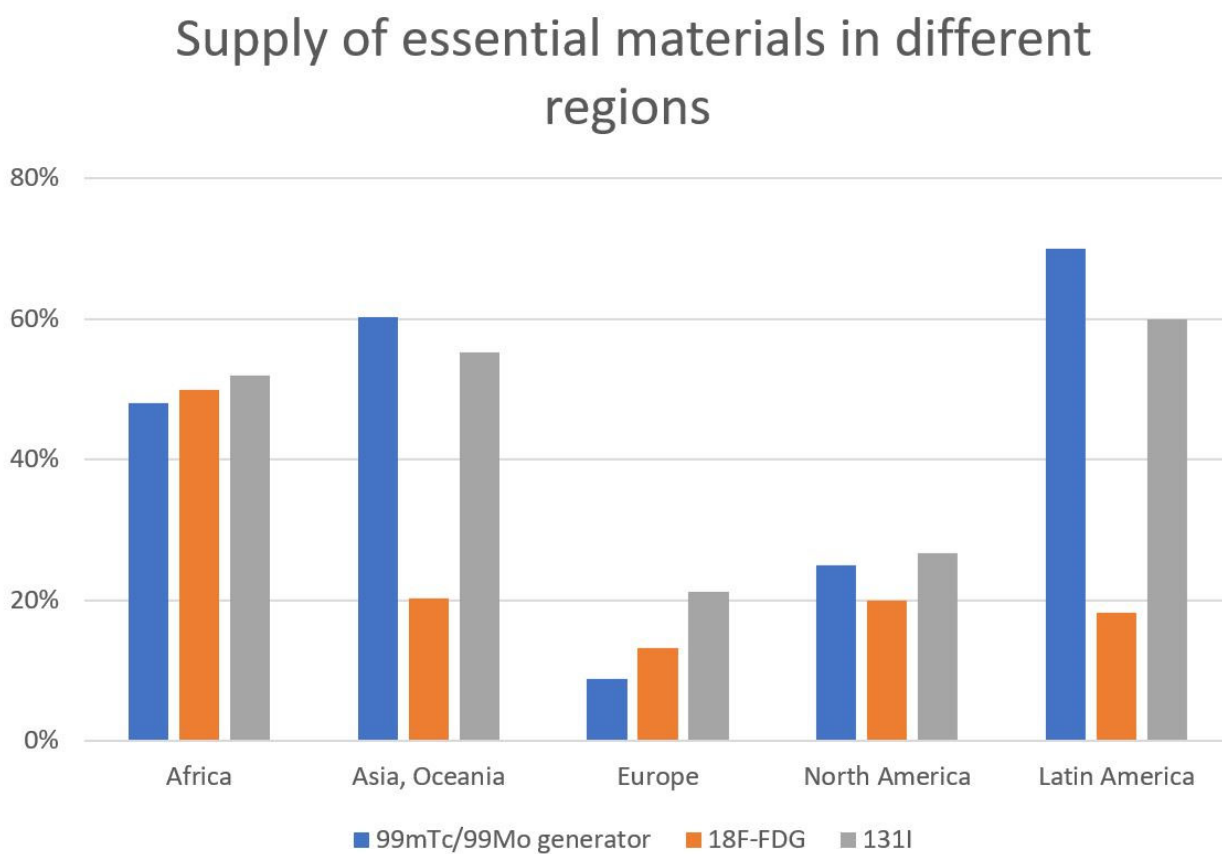

Supplemental Figure 3: Reduction of essential supplies in different regions

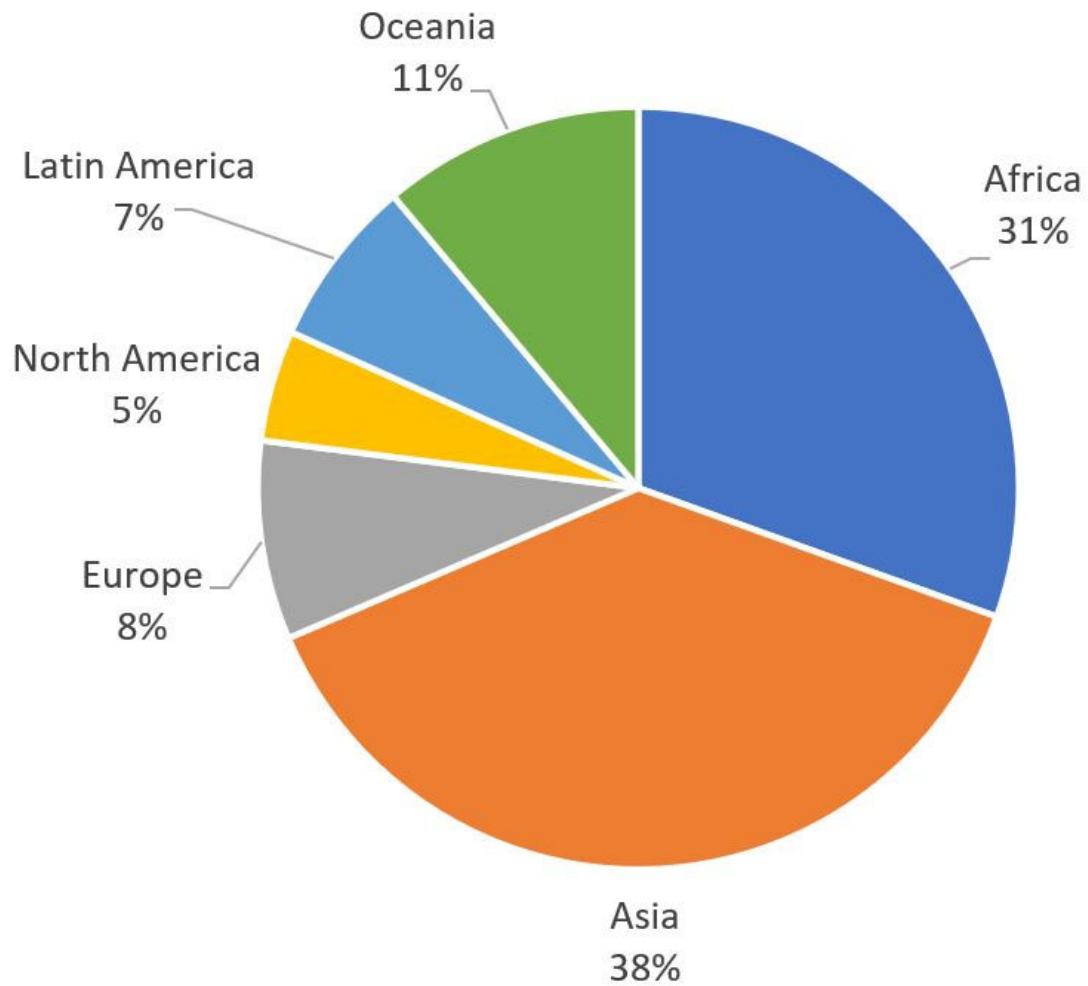

Supplemental Figure 4: Weighted distribution of respondents by continents according to the availability of SPECT / 1 million inhabitants registered in the IMAGINE database of the IAEA [24]

## **Appendix**

Survey “Influence of COVID-19 on Nuclear Medicine Departments International Survey”

## Influence of COVID-19 on Nuclear Medicine Departments International Survey

Dear Colleague,

The current COVID-19 crisis also has an impact on the care of nuclear medicine patients and the operation of nuclear medicine practices and clinics. These effects appear to be different due to the geographical location and structural conditions.

Together with the IAEA we would like to record the current effects, evaluate them and make them available to the members. The higher the participation rate, the more meaningful we get to third parties, such as administrations, health officials, etc. Therefore, we would like to ask you to take 5 minutes to answer this online questionnaire.

We thank you for your support.

With best regards!

Lutz Freudenberg and Ken Herrmann

| Organization                                                                                                       |                                                                                                                                                                                                                                                                                                                                                                                                                |
|--------------------------------------------------------------------------------------------------------------------|----------------------------------------------------------------------------------------------------------------------------------------------------------------------------------------------------------------------------------------------------------------------------------------------------------------------------------------------------------------------------------------------------------------|
| 1. Country                                                                                                         | .....                                                                                                                                                                                                                                                                                                                                                                                                          |
| 2. City                                                                                                            | .....                                                                                                                                                                                                                                                                                                                                                                                                          |
| 3. Where do you practice?                                                                                          | <input type="checkbox"/> University Hospital<br><input type="checkbox"/> Hospital<br><input type="checkbox"/> Private practice                                                                                                                                                                                                                                                                                 |
| 4. Your expertise                                                                                                  | <input type="checkbox"/> Nuclear medicine specialist<br><input type="checkbox"/> Radiologist<br>Other .....                                                                                                                                                                                                                                                                                                    |
| 5. Function or role in your department                                                                             | <input type="checkbox"/> Head of department<br><input type="checkbox"/> Consultant<br><input type="checkbox"/> Resident<br>Other .....                                                                                                                                                                                                                                                                         |
| Nuclear Medicine DIAGNOSTIC                                                                                        |                                                                                                                                                                                                                                                                                                                                                                                                                |
| 6. What is the "normal" proportion of outpatients in your department?                                              | <input type="checkbox"/> 0% - no outpatients in my department.<br><input type="checkbox"/> 10% <input type="checkbox"/> 20% <input type="checkbox"/> 30% <input type="checkbox"/> 40%<br><input type="checkbox"/> 50% <input type="checkbox"/> 60% <input type="checkbox"/> 70% <input type="checkbox"/> 80% <input type="checkbox"/> 90%<br><input type="checkbox"/> 100% - only outpatients in my department |
| 7. During the COVID-19 crisis: Was there a shift in the relationship between outpatients and stationary patients?  | <input type="checkbox"/> Yes<br><input type="checkbox"/> No                                                                                                                                                                                                                                                                                                                                                    |
| 8. If yes: What is the current proportion of outpatients and stationary patients?                                  | <input type="checkbox"/> 0% - no outpatients in my department.<br><input type="checkbox"/> 10% <input type="checkbox"/> 20% <input type="checkbox"/> 30% <input type="checkbox"/> 40%<br><input type="checkbox"/> 50% <input type="checkbox"/> 60% <input type="checkbox"/> 70% <input type="checkbox"/> 80% <input type="checkbox"/> 90%<br><input type="checkbox"/> 100% - only outpatients in my department |
| During the COVID-19 crisis: Did the number of nuclear medicine <b>diagnostic</b> procedures change? Please specify |                                                                                                                                                                                                                                                                                                                                                                                                                |
| 9. PET/CT                                                                                                          | -100% 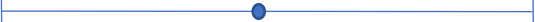 100%                                                                                                                                                                                                                                                                                                                |
| 10. Bone scintigraphy                                                                                              | -100% 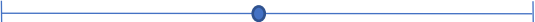 100%                                                                                                                                                                                                                                                                                                                |

|                                                                                                                 |                                                                                                                                                                                                                                                                                     |                                                                                    |      |
|-----------------------------------------------------------------------------------------------------------------|-------------------------------------------------------------------------------------------------------------------------------------------------------------------------------------------------------------------------------------------------------------------------------------|------------------------------------------------------------------------------------|------|
| 11. Myocardial scintigraphy                                                                                     | -100%                                                                                                                                                                                                                                                                               | 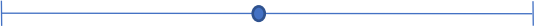 | 100% |
| 12. Lung scintigraphy                                                                                           | -100%                                                                                                                                                                                                                                                                               | 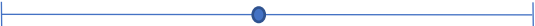 | 100% |
| 13. Thyroid scintigraphy                                                                                        | -100%                                                                                                                                                                                                                                                                               | 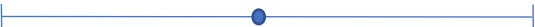 | 100% |
| 14. Sentinel lymph-node scintigraphy                                                                            | -100%                                                                                                                                                                                                                                                                               | 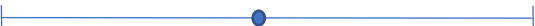 | 100% |
| 15. Others                                                                                                      | .....                                                                                                                                                                                                                                                                               |                                                                                    |      |
| <b>Nuclear Medicine THERAPY</b>                                                                                 |                                                                                                                                                                                                                                                                                     |                                                                                    |      |
| 16. Do you regularly perform nuclear medicine therapies in your department?                                     | <input type="checkbox"/> Yes<br><input type="checkbox"/> No                                                                                                                                                                                                                         |                                                                                    |      |
| <b>If YES: During the COVID-19 crisis, did the number of nuclear medicine therapies change? Please specify.</b> |                                                                                                                                                                                                                                                                                     |                                                                                    |      |
| 17. Thyroid (malignant)                                                                                         | -100%                                                                                                                                                                                                                                                                               | 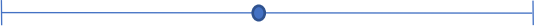 | 100% |
| 18. Thyroid (benign)                                                                                            | -100%                                                                                                                                                                                                                                                                               | 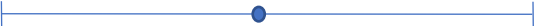 | 100% |
| 19. Selective internal radiation therapy (SIRT)                                                                 | -100%                                                                                                                                                                                                                                                                               | 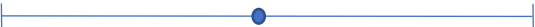 | 100% |
| 20. Peptide receptor radionuclide therapy (PRRT)                                                                | -100%                                                                                                                                                                                                                                                                               | 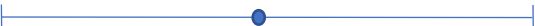 | 100% |
| 21. Prostate-specific membrane antigen (PSMA)                                                                   | -100%                                                                                                                                                                                                                                                                               | 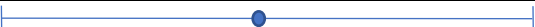 | 100% |
| 22. Radiosynoviorthesis (RSO)                                                                                   | -100%                                                                                                                                                                                                                                                                               | 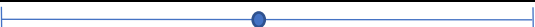 | 100% |
| <b>Personal Protective Equipment (PPE)</b>                                                                      |                                                                                                                                                                                                                                                                                     |                                                                                    |      |
| 23. Is there a shortage of personal protective equipment in your department for you and your employees?         | <input type="checkbox"/> Yes<br><input type="checkbox"/> No                                                                                                                                                                                                                         |                                                                                    |      |
| 24. For how many days do you have personal protective equipment on stock for you and your employees?            | <input type="checkbox"/> Less than 2 days<br><input type="checkbox"/> 2-7 days<br><input type="checkbox"/> 7-14 days<br><input type="checkbox"/> 14-28 days<br><input type="checkbox"/> more than 28 days                                                                           |                                                                                    |      |
| <b>Employee Health Organizational Adjustments to the COVID-19 Crisis</b>                                        |                                                                                                                                                                                                                                                                                     |                                                                                    |      |
| 25. Have employees in your department been infected with the new Corona virus?                                  | <input type="checkbox"/> No<br><input type="checkbox"/> Yes, less than 20% of the employees<br><input type="checkbox"/> Yes, 20% - 40% of the employees<br><input type="checkbox"/> Yes, 40% - 60% of the employees<br><input type="checkbox"/> Yes, more than 60% of the employees |                                                                                    |      |
| 26. Have employees of your department been transferred to other clinical departments and areas?                 | <input type="checkbox"/> No<br><input type="checkbox"/> Yes, less than 20% of the employees<br><input type="checkbox"/> Yes, 20%- 40% of the employees<br><input type="checkbox"/> Yes, 40%- 60% of the employees<br><input type="checkbox"/> Yes, more than 60% of the employees   |                                                                                    |      |
| 27. Have employees to work in short time?                                                                       | <input type="checkbox"/> No<br><input type="checkbox"/> Yes, less than 20% of the employees<br><input type="checkbox"/> Yes, 20%-70% of the employees<br><input type="checkbox"/> Yes, more than 70% of the employees                                                               |                                                                                    |      |
| 28. Do you use online tools in your department you have not used before?                                        | <input type="checkbox"/> No<br><input type="checkbox"/> Yes, online conferences<br><input type="checkbox"/> Yes, online reporting<br><input type="checkbox"/> Yes, video consultations for patients and referring physicians<br><input type="checkbox"/> Others .....               |                                                                                    |      |

|                                                                                                                                            |                                                                                                                                                                                                                                                                                                                                                                                                    |
|--------------------------------------------------------------------------------------------------------------------------------------------|----------------------------------------------------------------------------------------------------------------------------------------------------------------------------------------------------------------------------------------------------------------------------------------------------------------------------------------------------------------------------------------------------|
| 29. Have you taken other measures to deal with the crisis?                                                                                 | .....                                                                                                                                                                                                                                                                                                                                                                                              |
| <b>Supply of Mo/ Tc an other essential materials</b>                                                                                       |                                                                                                                                                                                                                                                                                                                                                                                                    |
| 30. Did you adjust your orders for Mo/Tc generators?                                                                                       | <input type="checkbox"/> No<br><input type="checkbox"/> Yes, we are still ordering >70% of our normally ordered activity<br><input type="checkbox"/> Yes, we are still ordering 20-70% of our normally ordered activity<br><input type="checkbox"/> Yes, we are still ordering less than 20% of our normally ordered activity<br><input type="checkbox"/> Yes, we have unsubscribe our generators. |
| 31. At any time during the pandemic, has the institution's <u>supply</u> of the following essential materials been <u>insufficient</u> ?   |                                                                                                                                                                                                                                                                                                                                                                                                    |
| 31.1. Mo/Tc generators                                                                                                                     | <input type="checkbox"/> Yes<br><input type="checkbox"/> No<br><input type="checkbox"/> Not applicable                                                                                                                                                                                                                                                                                             |
| 31.2. 18 F-FDG                                                                                                                             | <input type="checkbox"/> Yes<br><input type="checkbox"/> No<br><input type="checkbox"/> Not applicable                                                                                                                                                                                                                                                                                             |
| 31.3. Other 18 F labelled tracers                                                                                                          | <input type="checkbox"/> Yes<br><input type="checkbox"/> No<br><input type="checkbox"/> Not applicable                                                                                                                                                                                                                                                                                             |
| 31.4. Gallium 68 Generators                                                                                                                | <input type="checkbox"/> Yes<br><input type="checkbox"/> No<br><input type="checkbox"/> Not applicable                                                                                                                                                                                                                                                                                             |
| 31.5. Iodine 131                                                                                                                           | <input type="checkbox"/> Yes<br><input type="checkbox"/> No<br><input type="checkbox"/> Not applicable                                                                                                                                                                                                                                                                                             |
| 31.6. Lutetium 177                                                                                                                         | <input type="checkbox"/> Yes<br><input type="checkbox"/> No<br><input type="checkbox"/> Not applicable                                                                                                                                                                                                                                                                                             |
| 31.7. Radium 223                                                                                                                           | <input type="checkbox"/> Yes<br><input type="checkbox"/> No<br><input type="checkbox"/> Not applicable                                                                                                                                                                                                                                                                                             |
| 31.8. Samarium 153                                                                                                                         | <input type="checkbox"/> Yes<br><input type="checkbox"/> No<br><input type="checkbox"/> Not applicable                                                                                                                                                                                                                                                                                             |
| 31.9. Cold kits                                                                                                                            | <input type="checkbox"/> Yes<br><input type="checkbox"/> No<br><input type="checkbox"/> Not applicable                                                                                                                                                                                                                                                                                             |
| 31.10. Others                                                                                                                              | .....                                                                                                                                                                                                                                                                                                                                                                                              |
| 32. Do you have other/ other ideas for dealing with the effects of the COVID-19 crisis on nuclear medicine that you want to share with us? | .....                                                                                                                                                                                                                                                                                                                                                                                              |
| 33. Do you want to keep in touch with us? If yes, please share your email.                                                                 | .....                                                                                                                                                                                                                                                                                                                                                                                              |
